# Supplementary material for: One-step synthesis of ordered mesocomposites with non-ionic amphiphilic block copolymers: implications of isoelectric point, hydrolysis rate and fluoride
Source: Royal Society of Chemistry journal article supplement (doi:10.1039/b005608l), 2000-01-01
Supplement: b005608l.doc [file b005608l.doc]

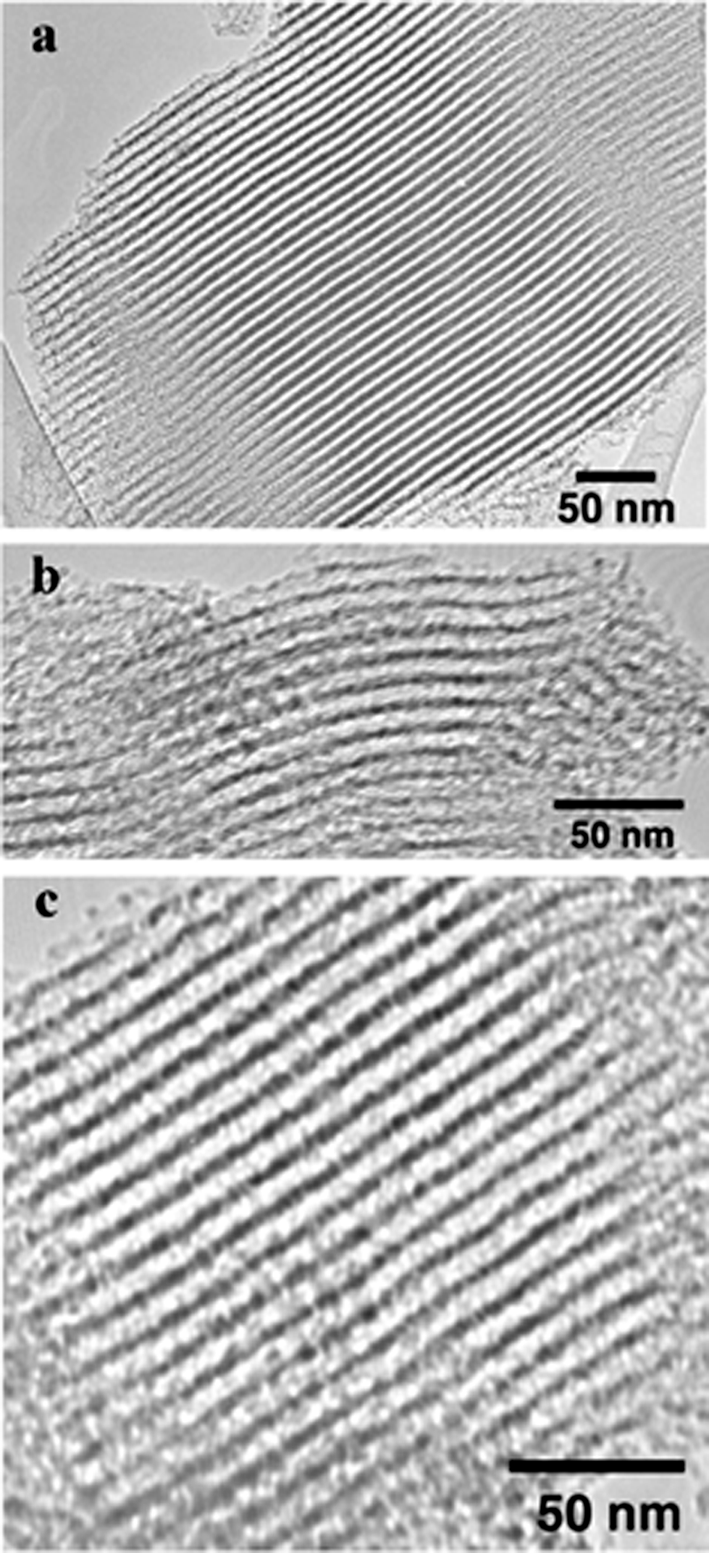


TEM images for calcined mesoporous silica prepared using P123 surfactant species and TMOS in the presence of fluoride at pH (a) 2.0, (b) 5.7 and (c) 9.0. The images were acquired with a 2000 FX JEOL instrument operating at 200 kV.
