# Supplementary material for: One-step synthesis of ordered mesocomposites with non-ionic amphiphilic block copolymers: implications of isoelectric point, hydrolysis rate and fluoride
Source: Royal Society of Chemistry journal article supplement (doi:10.1039/b005608l), 2000-01-01
Supplement: b005608lt1.doc [file b005608lt1.doc]

**Table 1** Properties of calcined mesoporous silica prepared using P123 surfactant species and TMOS in the presence of fluoride

| pH **a** | Lattice parameter**b**  /nm | Surface area**c**  /m2 g-1 | Pore volume**d**  /ml g-1 | Pore size**e**  /nm |
| --- | --- | --- | --- | --- |
| 0.0 | 12.6 | 727 | 1.1 | 7.5 |
| 2.0 | 12.7 | 743 | 1.1 | 8.1 |
| 4.0 | 12.9 | 614 | 1.7 | 9.5 |
| 5.7 | 12.7 | 588 | 1.6 | 9.5 |
| 9.0 | 13.0 | 585 | 1.6 | 9.5 |
| 9.0 | 13.4 | 572 | 1.7 | 9.5 |

# **a** pH values of the precursor HCl or NaOH solution used for the reactions. **b** lattice parameters calculated from *d* spacings in XRD patterns. **c** surface areas calculated with BET model. **d** Pore volumes calculated from *p*/*p*0 = 0.98. **e** Pore sizes obtained from N2 adsorption isotherms following the BdB analysis with cylindrical model.**21**
